# Supplementary material
Source: PubMed Central journal article supplement (PMC3586974)

## Supplementary Figure Legends

**Figure S1.** Optimization of Sn-Fc pre-complexes binding to human RBCs. Sn-Fc complexed with goat anti-human IgG Fc specific at ratios of 10:1, 5:1, 2.5:1 and 1.25:1. Histograms demonstrate the binding of Sn-Fc pre-complexes to human RBCs. Sialidase treated RBCs were used as a negative control (red histogram).

**Figure S2.** IFN- $\alpha$  induces the expression of Sn on bone marrow-derived macrophages (BMDM). BMDM from wild-type mice were enriched with M-CSF for 7 days and then were either stimulated with IFN- $\alpha$  (black histogram) or left untreated (dotted histogram) for 3 days. Expression of Sn was analysed using biotinylated anti-Sn antibodies followed by secondary antibody, staining with secondary antibody only was used as a control (solid grey histogram).

**Figure S3.** Expression of apoptosis markers based on SnL status. A, Bcl-2 mRNA expression in SnL<sup>+</sup> and SnL<sup>-</sup> enriched CD4<sup>+</sup> T cells. Surface expression of Fas (B) and FasL (C) in SnL<sup>+</sup> and SnL<sup>-</sup> CD4<sup>+</sup> T cells. Solid grey histograms represent isotype controls; black line histograms represent SnL<sup>+</sup> and dashed line histograms SnL<sup>-</sup> CD4<sup>+</sup> T cells, respectively.

Figure S1

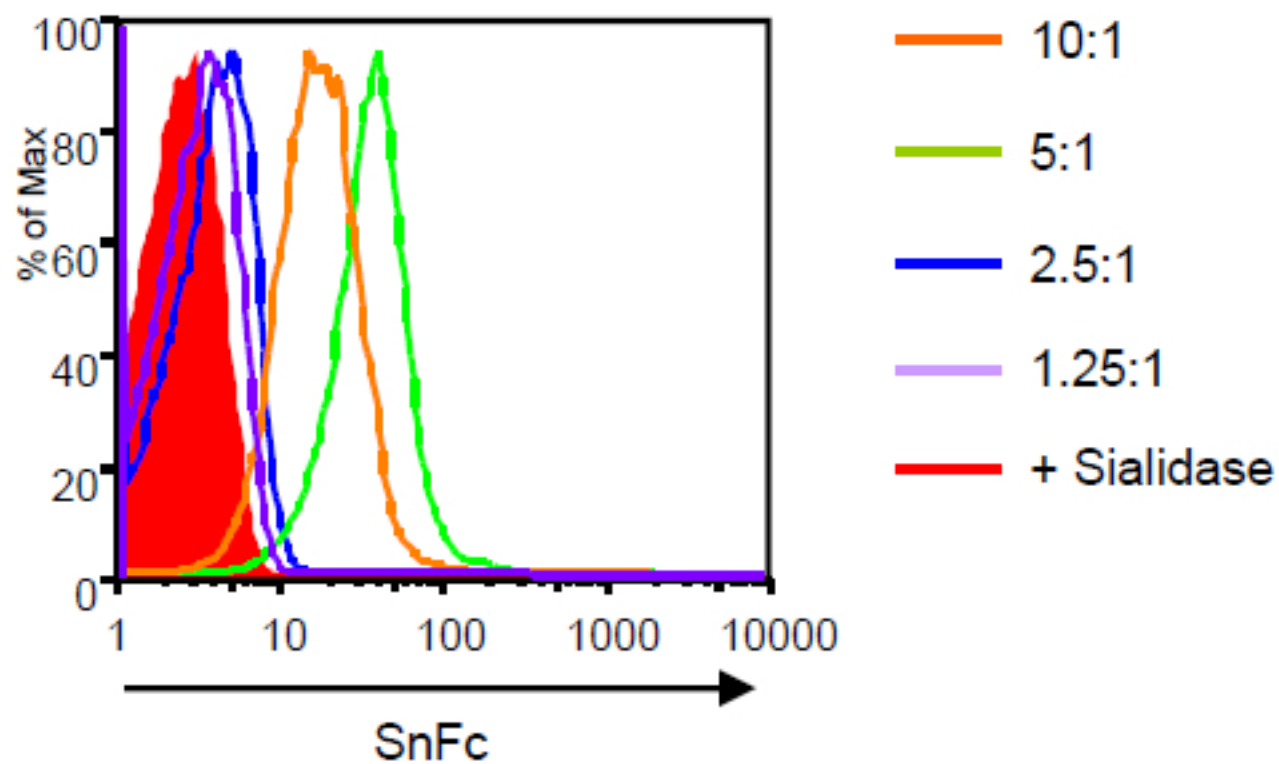

Figure S2

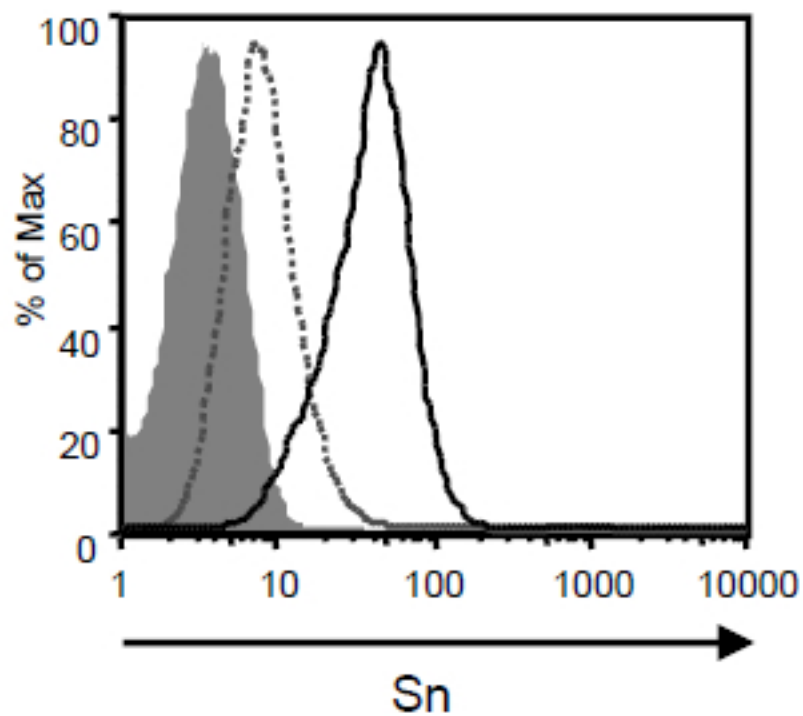

Figure S3

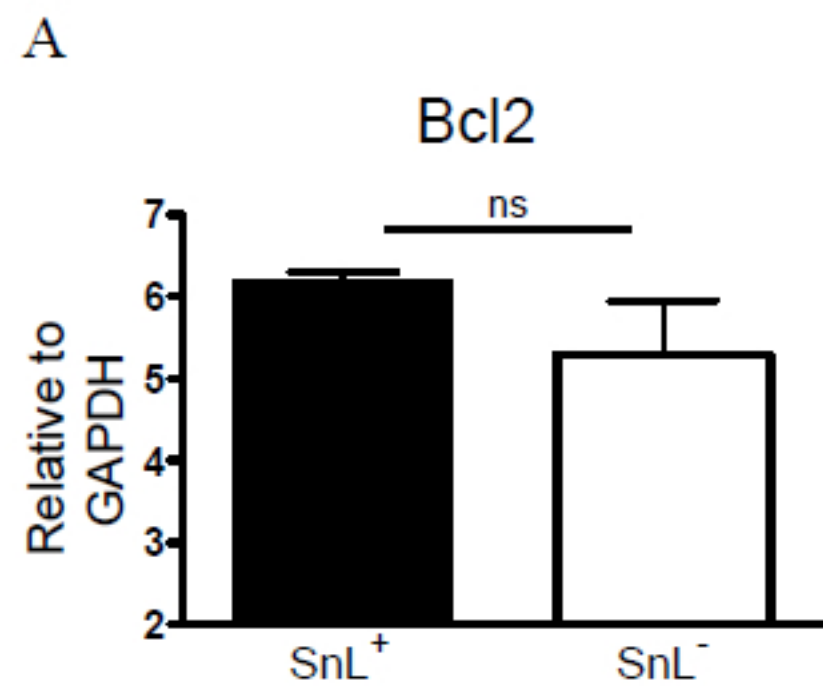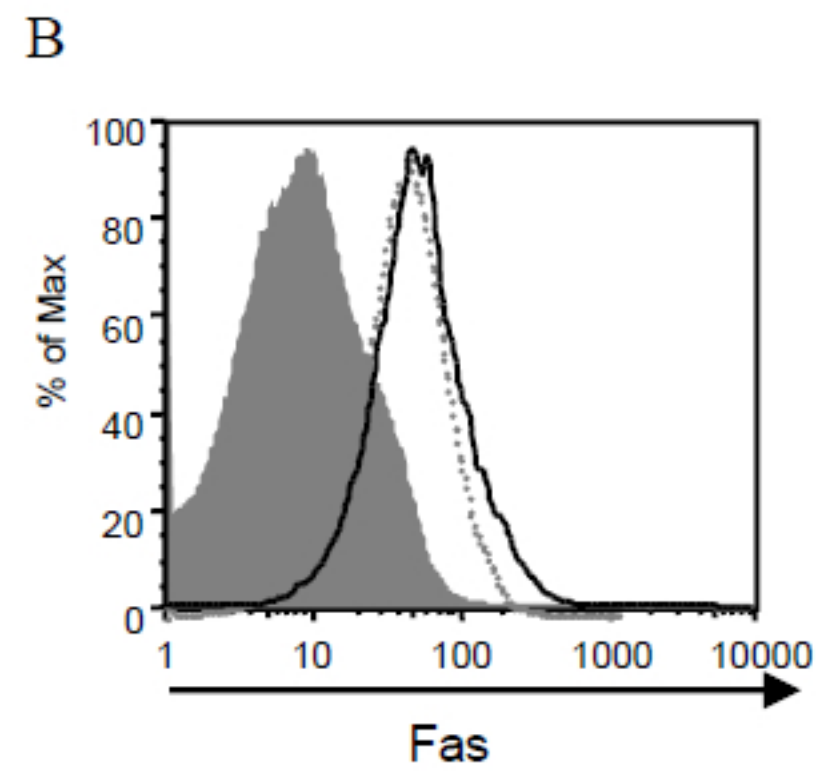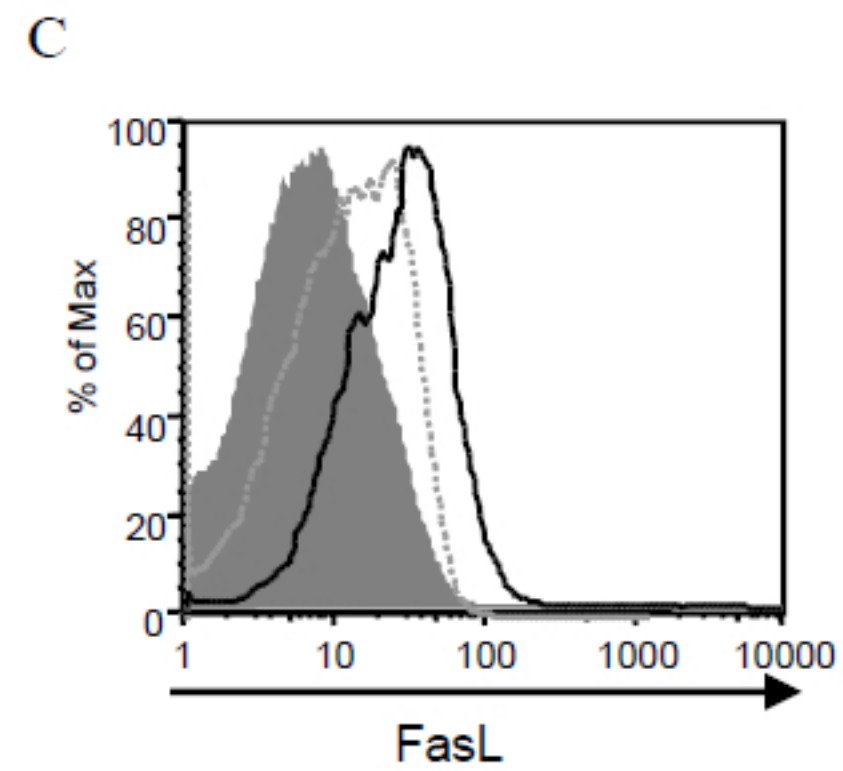

Supplement: supp_1201172_12-01172_S1-3.pdf [file supp_1201172_12-01172_S1-3.pdf]
